# Supplementary material for: Beyond Bar and Line Graphs: Time for a New Data Presentation Paradigm
Source: PLoS Biol. 2015 Apr 22;13(4):e1002128. doi: 10.1371/journal.pbio.1002128 (PMC4406565; doi:10.1371/journal.pbio.1002128)
Supplement: S2 Text — Use this template to create scatterplots for independent data in two to five groups. Independent data means that the variable of interest is measured one time in each subject, and subjects are not related to each other. If your data do not meet these criteria, see the spreadsheet for paired or nonindependent data. (XLSX) [file pbio.1002128.s002.xlsx]

## Sheet: No overlapping points
Independent data, points not jittered
Use this worksheet to create scatterplots for independent data in two to five groups, when there are no overlapping points within any group. Independent data means that the variable of interest is measured one time in each subject, and subjects are not related to each other. If your data do not meet this criteria, see the spreadsheet for paired or non-independent data. Overlapping points means th…
Downloaded from: Weissgerber TL, Milic NM, Winham SJ, Garovic VD. Beyond Bar and Line Graphs: Time for a New Data Presentation Paradigm. PLOS Biology, 2015:13. Updated versions will be posted at: https://www.ctspedia.org/do/view/CTSpedia/TemplateTesting
							Subject IDs: You may use this section to record subject IDs for each subject in each group
	Y- values							This information is not included in graphs; it is only for the investigators records
	Group 1	Group 2	Group 3	Group 4	Group 5		Group 1	Group 2	Group 3	Group 4	Group 5
	5	7	9	42	2		G1 - S1	G2 - S1	G3 - S1	G4 - S1	G5 - S1
	3	3	7	2	0		G1 - S2	G2 - S2	G3 - S2	G4 - S2	G5 - S2
	6	9	10	5	3		G1 - S3	G2 - S3	G3 - S3	G4 - S3	G5 - S3
	8	10	12	55	5		G1 - S4	G2 - S4	G3 - S4	G4 - S4	G5 - S4
	10	33	14	9	7		G1 - S5	G2 - S5	G3 - S5	G4 - S5	G5 - S5
	13	15	17	12	10		G1 - S6	G2 - S6	G3 - S6	G4 - S6	G5 - S6
	1	18	20	15	13		G1 - S7	G2 - S7	G3 - S7	G4 - S7	G5 - S7
	4	6	40	3	1		G1 - S8	G2 - S8	G3 - S8	G4 - S8	G5 - S8
	18	20	22		15		G1 - S9	G2 - S9	G3 - S9		G5 - S9
	4	30	35		1		G1 - S10	G2 - S10	G3 - S10		G5 - S10
	7		42		4		G1 - S11		G3 - S11		G5 - S11
	9		13		6		G1 - S12		G3 - S12		G5 - S12
	14				11		G1 - S13				G5 - S13
	15				12		G1 - S14				G5 - S14
	17				14		G1 - S15				G5 - S15
Median	8	12.5	15.5	10.5	6
Instructions
Label the x-axis
Replace the light green cells labelled "Group 1", "Group 2", "Group 3", "Group 4" and "Group 5" in the "y-values" section with your group names
The graph x-axis labels should automatically update.
Enter the y-values for each subject in each group in the colored section on the left.
Subject IDs can be entered in the colored chart on the right. This info is not included in graphs - it is only for the investigators records.
You do not need to have equal numbers of subjects in each group. Enter the data that you have, and leave all other cells blank.
If you have fewer than 20 subjects, leave additional spaces blank
If you have more than 20 subjects, follow the instructions in the purple box to the right.
The black lines show the group median. This should automatically update as you enter your data.
Label the y-axis
Select the chart showing the number of groups that you have
Relabel the y-axis by clicking on the label, and typing in your information
Adjust the y-axis scale as needed by right clicking on the y-axis, and selecting "Format axis"
Additional groups can be added to the scatterplot if needed
Mac users: You may need to click on the plot area for the graph to update.
For questions regarding the use of this template, please email Tracey Weissgerber (weissgerber.tracey@mayo.edu).
Interpreting the Graph
Open circles show measurements for each participant or observation.
Black lines show the group medians.
Changing Medians to Means
If you use non-parametric statistical analyses, you should show the median. The mean should never be shown for data that are analyzed non-parametrically, as these data do not meet the distributional assumptions required to calculate the mean. If you have consulted a statistician and confirmed that your data meet the assumptions required for parametric testing the graphs can be changed to show the…
To add additional subjects:
Add data for additional subjects starting in row 51. If you need to add more that 5 subjects in any group, insert new rows between row 51 and 55.
Find the graph with the right number of groups for your data. Repeat the steps below for each row in which you add one or more subjects.
Only add subjects in row series; never in column series.
Right click on the plot area; click "Select data"; then click "Add" in the pop-up window
Click on the chart symbol next to "series values"; highlight the values for each group that you are including in the row where you have
entered data for new subjects; click "OK" in the pop-up window
For example, if you have 3 groups, highlight columns B, C and D. Highlight all three columns even if you did not enter data in all columns.
The new subjects should appear in the graph. Right click on the new series, and select "Format Data Series", and make the following changes:
Line Color: No line
Marker options: Built in, circle, 5 pt
Marker fill: Solid color, white
Marker line color: Solid color, black
Repeat these steps for each new row of subjects that you add.
The median will automatically update to include new subjects, even if the point does not show because you have not yet added a new series.

## Sheet: Points jittered
Independent data, points jittered to prevent overlap
Use this worksheet to create scatterplots for independent data in two to five groups, when there are overlapping points in at least one group. Independent data means that the variable of interest is measured one time in each subject, and subjects are not related to each other. If your data do not meet this criteria, see the spreadsheet for paired or non-independent data. Overlapping points means …
Downloaded from: Weissgerber TL, Milic NM, Winham SJ, Garovic VD. Beyond Bar and Line Graphs: Time for a New Data Presentation Paradigm. PLOS Biology, 2015:13. Updated versions will be posted at: https://www.ctspedia.org/do/view/CTSpedia/TemplateTesting
Group Name	Subject ID	Measurement (y-axis)		Adjustment on x-axis to prevent overlap
	1	1		0.5
	2	2		0.5
	3	3		0.5
	4	4		0.5
	5	6		0.5
	6	7		0.5
	7	11		0.4
	8	11		0.5
	9	11		0.6
	10	13		0.45
	11	13		0.55
	12	18		0.5
	13			0.5
	14			0.5
	15			0.5
	16			0.5
	17			0.5
	18			0.5
	19			0.5
	20			0.5
	21	5		1.5
	22	6		1.5
	23	7		1.5
	24	8		1.5
	25	9		1.5
	26	11		1.5
	27	13		1.5
	28	15		1.5
	29	17		1.5
	30	19		1.5
	31			1.5
	32			1.5
	33			1.5
	34			1.5
	35			1.5
	36			1.5
	37			1.5
	38			1.5
	39			1.5
	40			1.5
	41	15		2.5
	42	16		2.5
	43	18		2.5
	44	19		2.5
	45	23		2.5
	46	25		2.5
	47	28		2.5
	48			2.5
	49			2.5
	50			2.5
	51			2.5
	52			2.5
	53			2.5
	54			2.5
	55			2.5
	56			2.5
	57			2.5
	58			2.5
	59			2.5
	60			2.5
	61	12		3.5
	62	13		3.5
	63	15		3.5
	64			3.5
	65			3.5
	66			3.5
	67			3.5
	68			3.5
	69			3.5
	70			3.5
	71			3.5
	72			3.5
	73			3.5
	74			3.5
	75			3.5
	76			3.5
	77			3.5
	78			3.5
	79			3.5
	80			3.5
	81	2		4.5
	82	5		4.5
	83	6		4.5
	84	9		4.5
	85	10		4.5
	86			4.5
	87			4.5
	88			4.5
	89			4.5
	90			4.5
	91			4.5
	92			4.5
	93			4.5
	94			4.5
	95			4.5
	96			4.5
	97			4.5
	98			4.5
	99			4.5
	100			4.5
Group 1 Median		9		0.5
Group 2 Median		10		1.5
Group 3 Median		19		2.5
Group 4 Median		13		3.5
Group 5 Median		6		4.5
Instructions
Enter the Subject ID and y values for subjects in each group.
Enter the data for each group in rank order (highest to lowest, or lowest to highest).
Enter your group names under "Group Names." This column is not linked to graphs - it is for your records only.
If you have fewer than 20 subjects in a group, leave extra spaces blank
If you have more than 20 subjects in a group, add additional rows by inserting rows in the middle of the group. The points should appear as soon as you enter
the x and y values. Ensure that the x value matches the value for the rest of the group; otherwise the point will appear in the wrong column.
Black lines show the group median. This should automatically update as you enter your data.
Manually jitter the points
Change the "Adjustment value for x-axis" for all overlapping points to ensure that each point is visible.
For example, two points in group 1 have a value of 13; therefore the x-values for these points were changed from 0.5 to to to 0.45 and 0.55.
Adjustment values for the x-axis will be centered around 0.5 for Group 1, 1.5 for Group 2, 2.5 for Group 3, 3.5 for Group 4, and 4.5 for Group 5.
Label the axes
Select the graph showing the number of groups that you have
Relabel the y-axis by clicking on the label, and typing in your information
Adjust the y-axis scale as needed by right clicking on the y-axis, and selecting "Format axis"
Paste the graph into power point or other software to add group labels on x-axis.
Mac users: You may need to click on the plot area for the graph to update.
For questions regarding the use of this template, please email Tracey Weissgerber at weissgerber.tracey@mayo.edu.
Interpreting the Graph
Open circles show measurements for each participant or observation.
Black lines show the group medians.
Changing Medians to Means
If you use non-parametric statistical analyses, you should show the median. The mean should never be shown for data that are analyzed non-parametrically, as these data do not meet the distributional assumptions required to calculate the mean. If you have consulted a statistician and confirmed that your data meet the assumptions required for parametric testing the graphs can be changed to show the…
